# Supplementary material
Source: PubMed Central journal article supplement (PMC5517315)
Supplement: NIHMS852396-supplement-2.pdf [file NIHMS852396-supplement-2.pdf]

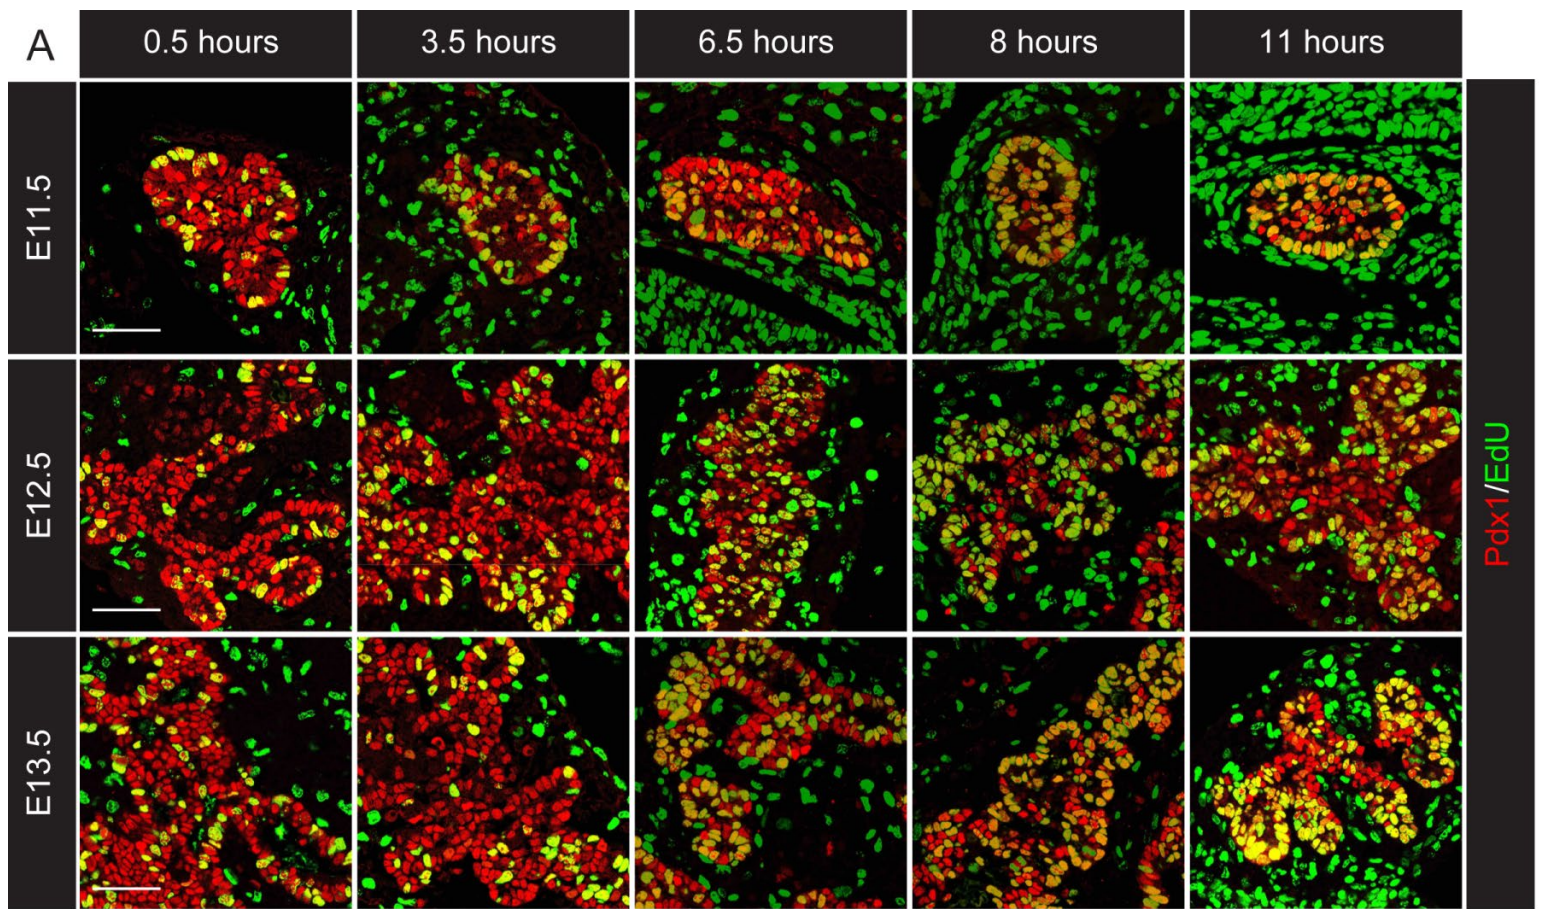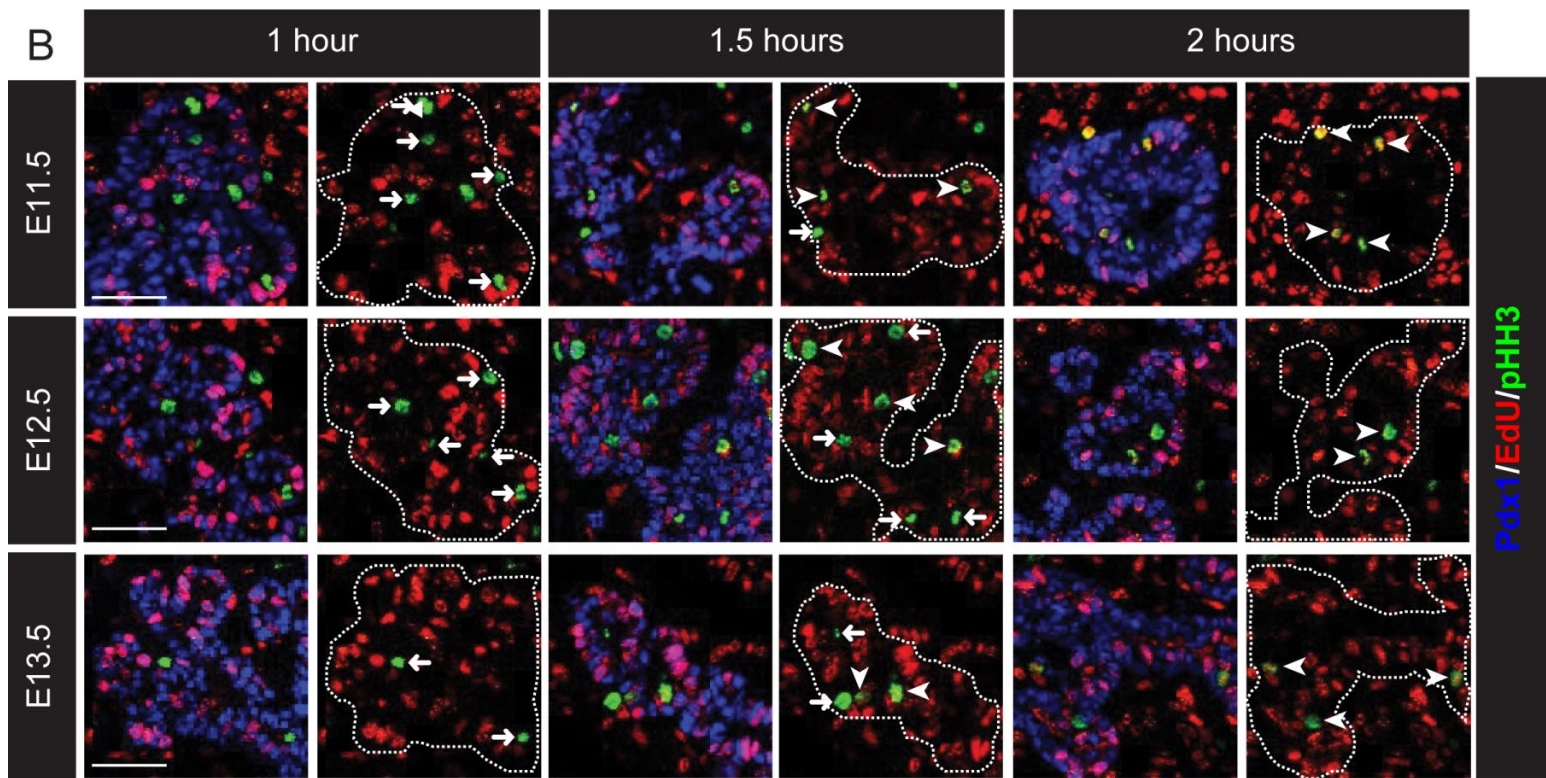

**Figure S1: Cumulative EdU labeling demonstrated cell cycle length increases during development, related to Figure 1.**

(A) Immunofluorescence confocal images of time dependent incorporation of EdU into pancreatic progenitors (PDX1; red & EdU; green) at E11.5, E12.5 and E13.5 after 0.5, 3.5, 6.5, 8 and 11 hours of EdU labeling.

(B) Immunofluorescent staining for PDX1 (blue), EdU (red), and pHH3 (green) in E11.5, E12.5 and E13.5 embryos sacrificed at 1, 1.5 and 2 hours following a single injection of EdU; arrowheads: pHH3+EdU+ and arrows: pHH3+EdU-, pancreatic epithelium outlined (--). Scale bars = 50  $\mu$ m.

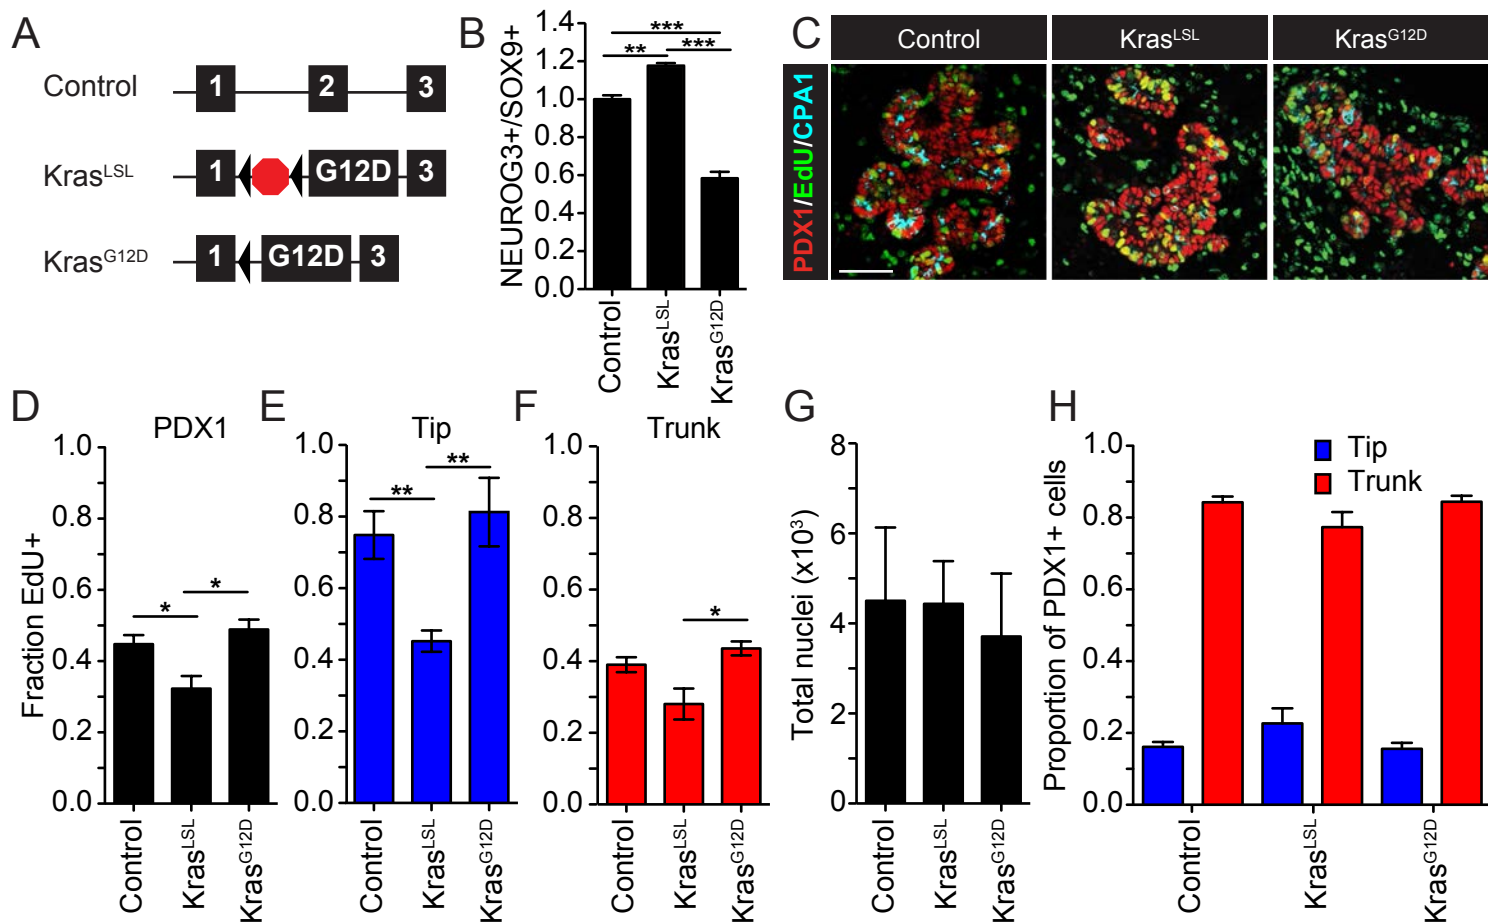

**Figure S2: Kras<sup>LSL-G12D</sup> mutations lead to altered cell cycle length during mouse pancreatic development, related to Figure 2.**

(A) Schematic outlining the alleles present in the three different genotypes.

(B) Quantification of the number of NEUROG3+ cells relative to SOX9+ trunk cells in Control, Kras<sup>LSL</sup> and Kras<sup>G12D</sup> embryos at E13.5. n = 3. \*\*p < 0.01, \*\*\*p < 0.001 by one-way ANOVA and Tukey post test.

(C) PDX1 (red), CPA1 (cyan) and EdU (green) immunostaining in Control, Kras<sup>LSL</sup> and Kras<sup>G12D</sup> embryos at E12.5 following 3.5 hours of EdU exposure. Scale bar = 50 μm.

(D-F) Kras<sup>LSL</sup> embryos had reduced EdU-labeled PDX1+ pancreatic progenitor cells and (E) reduced EdU+ tip cells (PDX1+CPA1+) but (F) no significant changes in EdU+ trunk cells (PDX1+CPA1-) at E12.5. n = 3 \*p < 0.05, \*\*p < 0.01 by one-way ANOVA and Tukey post test.

(G) The total number of E12.5 pancreatic cells did not change with Kras expression level. n = 3.

(H) The relative proportion of tip and trunk cells in Control, Kras<sup>LSL</sup> and Kras<sup>G12D</sup> embryos at E12.5 remained constant. n = 3.

Data are presented as mean ± SEM.

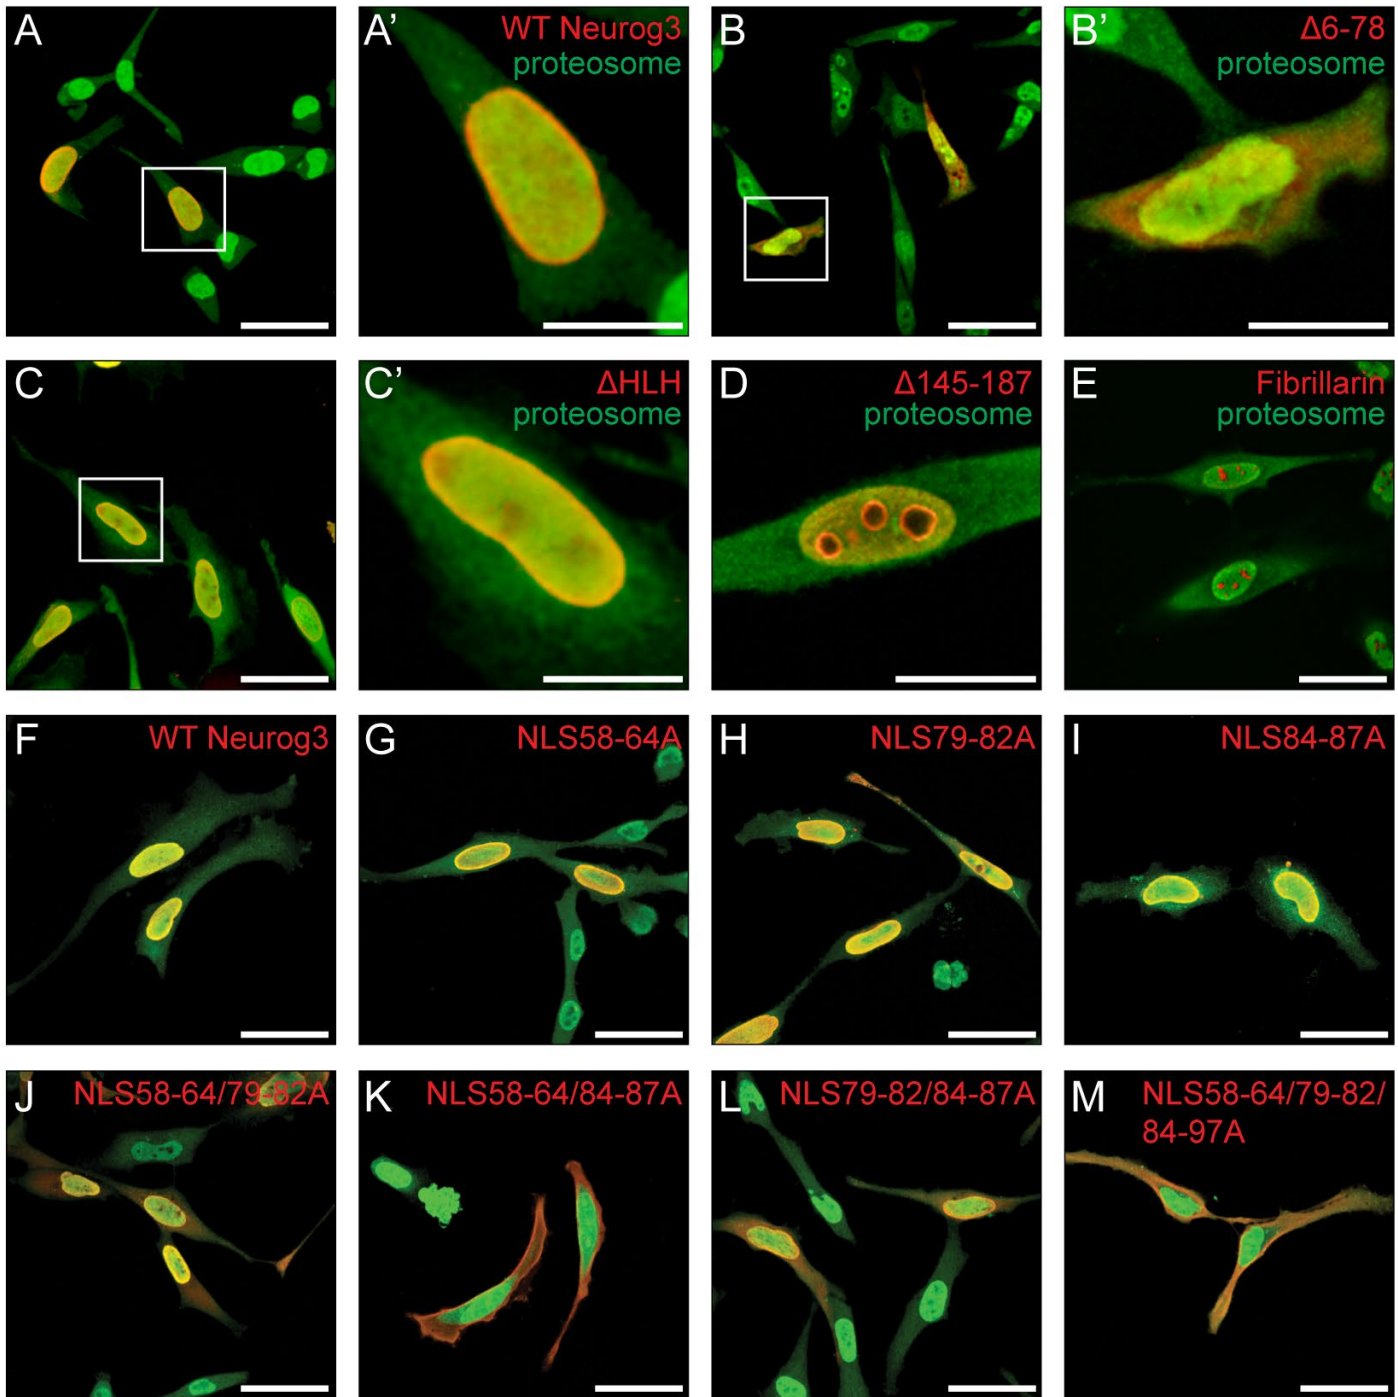

**Figure S3. NEUROG3 requires its N-terminal region for efficient nuclear localization and nuclear import requires at least one of its two NLSs, related to Figures 3 and 4.**

(A-C) HeLa cells expressing FLAG-tagged WT NEUROG3 (A), NEUROG3<sub>Δ6-78</sub> (B), NEUROG3<sub>ΔHLH</sub> (C) or NEUROG3<sub>Δ145-187</sub> (D) were fixed and stained with anti-FLAG antibody (red) and anti-proteasome 20S α/β antibody (green). Scale bars = 50 μm.

(A'-C') Higher magnifications of the indicated areas. Scale bars = 20 μm.

(E) HeLa cells expressing FLAG-tagged NEUROG3<sub>Δ145-187</sub> stained for fibrillarin (red) and proteasome (green).

(F-M) HeLa cells expressing FLAG-tagged WT NEUROG3 (F) or mutants with the arginine and lysine residues in their putative NLSs mutated to alanine (G-M) were stained with anti-FLAG antibody (red) and anti-proteasome 20S α/β antibody (green).

Representative of n = 3.

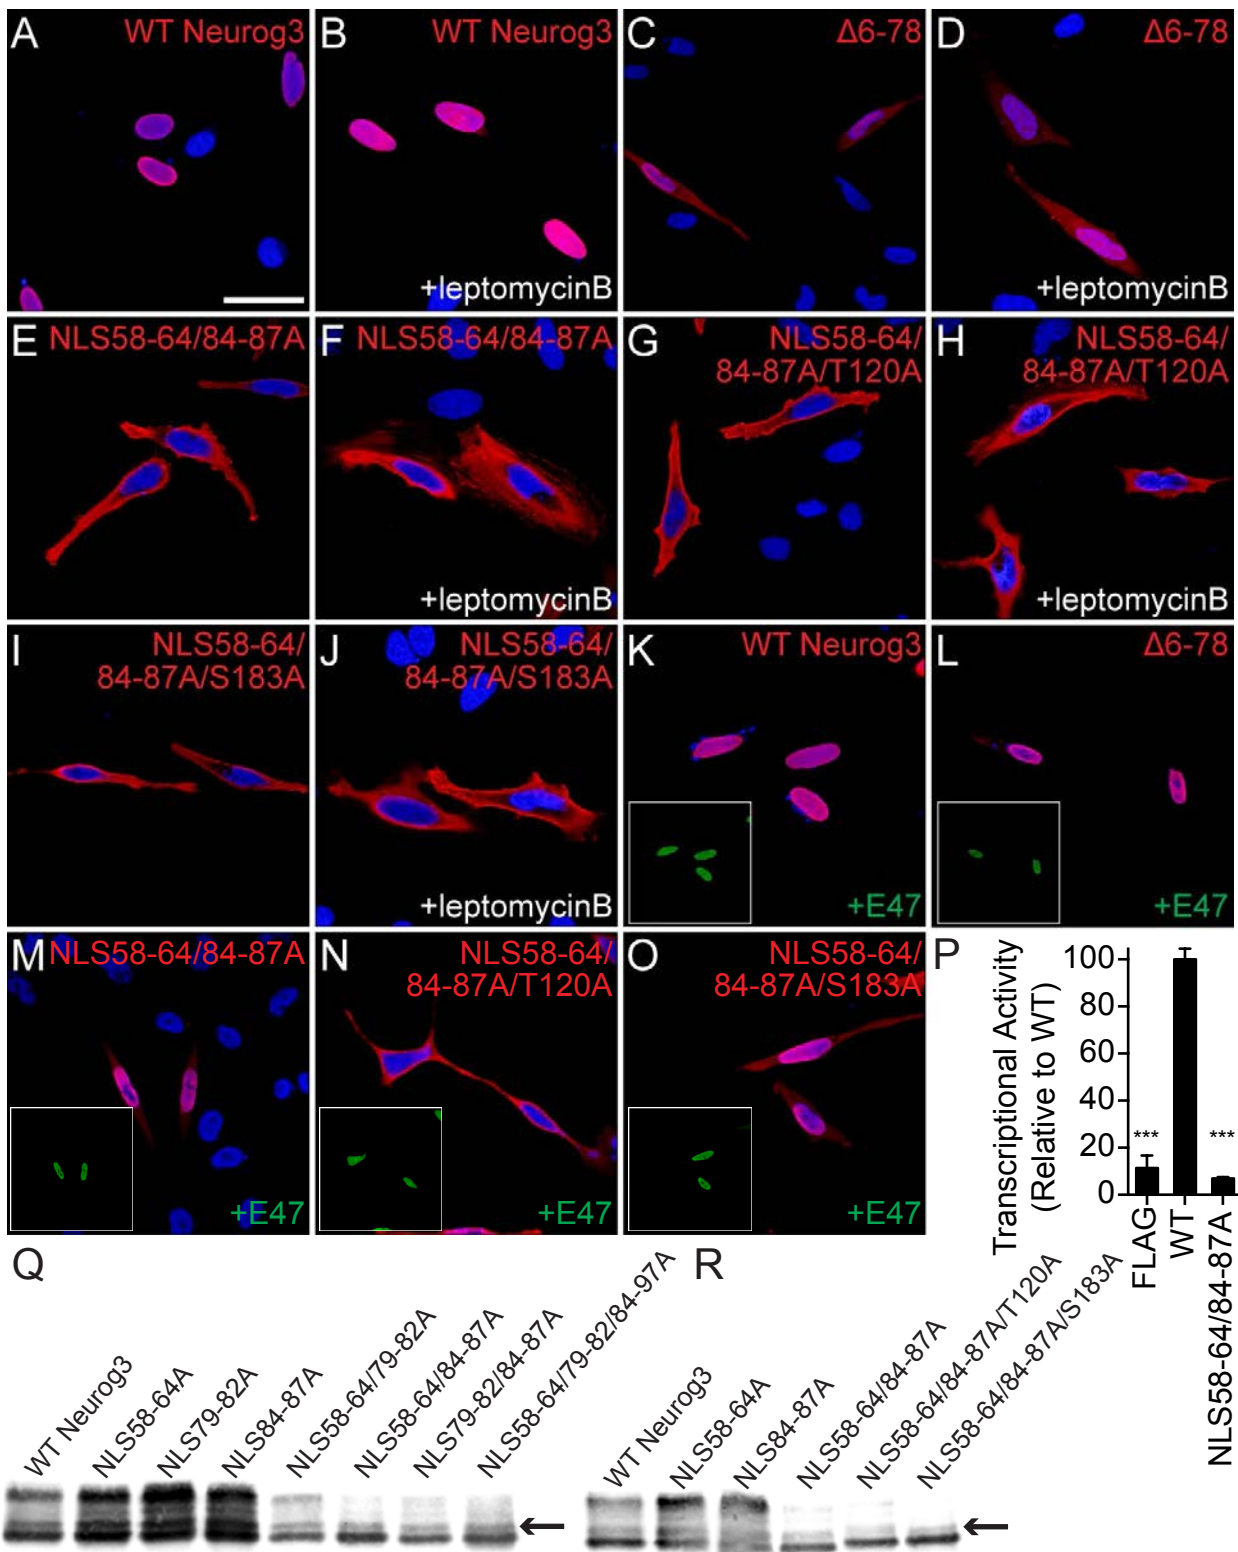

**Figure S4: Nuclear import of NEUROG3 precedes hyperphosphorylation, requires at least one of its two NLSs or E47, and involves T120, related to Figures 3 and 4.**

(A-O) HeLa cells expressing FLAG-tagged NEUROG3 constructs were incubated with leptomycin B, to inhibit nuclear export, or cotransfected with 6×His-tagged E47 as indicated. Cells were stained with anti-FLAG (red), anti-6×His antibodies (green) and DAPI (blue). Scale bars = 50 μm. n = 3.

(P) Relative luciferase levels were measured for HeLa cells transfected with the Pax4 promoter driving Luciferase reporter, a Hnf1α-expression construct and indicated empty or FLAG-tagged NEUROG3 expression construct. \*\*\*p < 0.0005. n = 3

(Q&R) Western blots probed with anti-FLAG antibody with lysates of HeLa cells expressing FLAG-tagged WT NEUROG3 (lane 1) or the NLS mutants as indicated. Arrows indicate a slower migrating band representing a form that is likely phosphorylated outside the nucleus. n = 3

Data are presented as mean ± SEM.

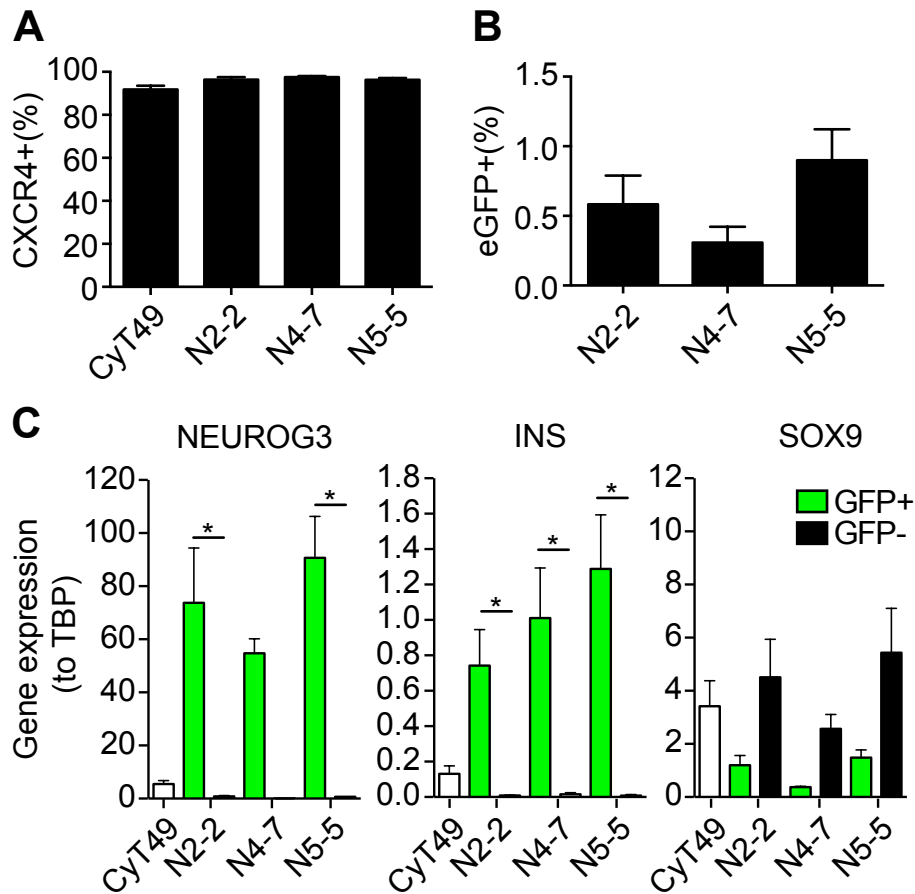

**Figure S5: Validation of Neurog3-2A-eGFP CyT49 hESC reporter lines, related to Figure 6.**

(A) Three clonally-derived CyT49 reporter lines were differentiated using Rezania et al., 2014 protocol to definitive endoderm (S2D1), fixed and stained for CXCR4 and the number of CXCR4+ cells was quantified using flow cytometry. n = 7 from two differentiations.

(B) Reporter hESC lines were differentiated to stage 6 and the number of GFP+ (NEUROG3+) cells were quantified using flow cytometry. n = 7 from two differentiations.

(C) NEUROG3 and INSULIN transcription was increased in GFP+ cells compared to GFP- cells in Stage 6 endocrine progenitors in N2-2, N4-7 and N5-5 hESC lines. Conversely, SOX9 expression was higher in GFP- cells compared to GFP+ cells. \*p < 0.05 by one-way ANOVA and Tukey post test. n = 3 from two differentiations. Data are presented as mean ± SEM.
